# Supplementary material
Source: publisher figshare collection journal article supplement (https://aacr.figshare.com/articles/dataset/_/23905220)
Supplement: Supplementary file 1 [file 41911403]

**Supplemental Table 2.** Recurrent regions of copy number gain and loss together with the candidate genes located within the regions.

**A. Regions of gain.**

| <b>Region</b> | <b>Cytoband</b> | <b>Start</b> | <b>End</b>  | <b>Candidate genes</b>           |
|---------------|-----------------|--------------|-------------|----------------------------------|
| <b>G1</b>     | 1p36.33         | 1,688,462    | 1,960,160   | <i>CDK11A/B, CALML6, NADK</i>    |
| <b>G2</b>     | 1q21.1          | 146,023,079  | 149,331,955 | <i>NBPF10, NOTCH2NL</i>          |
| <b>G3</b>     | 1q21.3          | 150,542,525  | 150,594,423 | <i>MCL1</i>                      |
| <b>G4</b>     | 1q22            | 156,189,235  | 156,298,108 | <i>BGLAP, SMG5</i>               |
| <b>G5</b>     | 1q23.3          | 160,642,011  | 160,825,109 | <i>SLAMF7, CD48, LY9, SLAMF1</i> |
| <b>G6</b>     | 1q24.2          | 167,212,297  | 167,970,941 | <i>POU2F1, CREG1, DCAF6</i>      |
| <b>G7</b>     | 1q25.2          | 178,226,546  | 179,305,784 | <i>RALGPS2, ABL2, RASAL2</i>     |
| <b>G8</b>     | 1q32.1          | 203,246,823  | 203,377,011 | <i>BTG2, FMOD</i>                |
| <b>G9</b>     | 1q44            | 247,158,599  | 248,946,422 | <i>NLRP3</i>                     |

**B. Regions of deletion.**

| <b>Region</b> | <b>Cytoband</b> | <b>Start</b> | <b>End</b>  | <b>Candidate genes</b>                                |
|---------------|-----------------|--------------|-------------|-------------------------------------------------------|
| <b>D1</b>     | 1p36.33         | 1            | 1,808,460   | <i>TNFRSF4, DVL1, CDK11A/B, CCNL2, TNFRSF18, MIB2</i> |
| <b>D2</b>     | 1p35.3          | 29,315,089   | 31,907,425  | <i>SDC3, PUM1</i>                                     |
| <b>D3</b>     | 1p33            | 50,183,629   | 51,109,627  | <i>FAF1, CDKN2C</i>                                   |
| <b>D4</b>     | 1p31.1          | 70,904,779   | 74,501,017  | <i>NEGR1, PTGER3</i>                                  |
| <b>D5</b>     | 1p31.1          | 76,627,494   | 87,337,216  | <i>BCL10, FUBP1, PRKACB, PTGFR, DNAJB4</i>            |
| <b>D6</b>     | 1p22.1          | 92,383,744   | 93,156,082  | <i>RPL5, EVI5, GFI1, MTF2</i>                         |
| <b>D7</b>     | 1p12            | 117,501,979  | 117,869,477 | <i>TENT5C</i>                                         |
